# Supplementary material
Source: PubMed Central journal article supplement (PMC10185925)
Supplement: 13312_2023_2891_MOESM1_ESM.pdf [file 13312_2023_2891_MOESM1_ESM.pdf]

WEB TABLE 1 Characteristics of Children with Nephrotic Syndrome having COVID-19 Infection

| Characteristics                                             | Value                                         |
|-------------------------------------------------------------|-----------------------------------------------|
| Age (y) <sup>a</sup>                                        | 6.20 (3.81-9.0)                               |
| Male sex                                                    | 16 (53.3)                                     |
| History of contact                                          | 14 (46.7)                                     |
| Symptoms of COVID-19                                        |                                               |
| Fever                                                       | 10 (33.3)                                     |
| Cough                                                       | 9 (30.0)                                      |
| Fast breathing                                              | 4 (13.3)                                      |
| Myalgia                                                     | 4 (13.3)                                      |
| Headache                                                    | 3 (10.0)                                      |
| Nausea and Vomiting                                         | 3 (10.3)                                      |
| Abdominal Pain                                              | 7 (23.3)                                      |
| Diarrhea                                                    | 4 (13.3)                                      |
| Severity of COVID-19                                        |                                               |
| mild/moderate/severe                                        | 12 (40)/11 (36.6)/(23.3)                      |
| Respiratory support                                         |                                               |
| Oxygen                                                      | 8 (26.6)                                      |
| Invasive Support                                            | 3 (10.0)                                      |
| Outcome                                                     |                                               |
| Discharge                                                   | 25 (83.3)                                     |
| Death                                                       | 5 (16.6)                                      |
| Type of Nephrotic Syndrome                                  |                                               |
| FENS/IFRNS/FRNS/SDNS/SRNS                                   | 7 (23.3)/ 3(10.0)/ 2(6.66)/ 8(26.6)/ 10(33.3) |
| DTTNS                                                       | 12 (40)                                       |
| Status of Nephrotic syndrome                                |                                               |
| Relapse                                                     | 23 (76.6%)                                    |
| Remission                                                   | 07 (30.4%)                                    |
| Immunosuppression                                           |                                               |
| Steroids                                                    | 29 (96.6)                                     |
| Mycophenolate mofetil                                       | 07 (23.3)                                     |
| Calcineurin inhibitor                                       | 07 (23.3)                                     |
| Rituximab                                                   | 02 (6.66)                                     |
| Cyclophosphamide                                            | 03 (10.0)                                     |
| Levamisole                                                  | 04 (13.3)                                     |
| Hospital stay (d) <sup>a</sup>                              | 7.23 (7.5)                                    |
| Baseline serum creatinine (mg/dL) <sup>a</sup>              | 0.37 (0.113)                                  |
| Peak serum creatinine (mg/dL) <sup>a</sup>                  | 0.50 (0.45)                                   |
| AKI                                                         | 9 (30)                                        |
| Stage 1                                                     | 1 (3.33)                                      |
| Stage 2                                                     | 4 (13.3)                                      |
| Stage 3                                                     | 4 (13.3)                                      |
| Complications                                               |                                               |
| Pneumonia                                                   | 9 (30.0)                                      |
| Sepsis                                                      | 17(56.6)                                      |
| Shock and vasopressor support                               | 3 (10.0)                                      |
| Antibiotics                                                 | 17 (56.6)                                     |
| Nephrotoxic medications                                     | 9 (30.0)                                      |
| Laboratory Results                                          |                                               |
| Hemoglobin (gm%) <sup>b</sup>                               | 11.3 (2.57)                                   |
| Total leukocyte count (mm <sup>3</sup> ) <sup>b</sup>       | 11000 (4283.24)                               |
| Absolute neutrophilic count (mm <sup>3</sup> ) <sup>b</sup> | 5951 (8098.90)                                |
| PMN/Lymphocyte Ratio <sup>b</sup>                           | 2.32 (2.12)                                   |
| Platelet Count (mm <sup>3</sup> ) <sup>b</sup>              | 445000 (231387.7)                             |

Values are expressed as n(%), or <sup>a</sup> (median IQR), or <sup>b</sup> (mean SD)

FENS, first episode nephrotic syndrome; IFRNS, Infrequent relapsing nephrotic syndrome; FRNS, frequent relapsing nephrotic syndrome; SDNS, steroid dependent nephrotic syndrome; SRNS, steroid resistant nephrotic syndrome; DTTNS, difficult to treat nephrotic syndrome; AKI, acute kidney injury; PMN, polymorph nuclear cell
